# Supplementary material for: A Draft Genome of the Ginger Species Alpinia nigra and New Insights into the Genetic Basis of Flexistyly
Source: MDPI journal article supplement (doi:10.3390/genes12091297), 2021-08-24
Supplement: s1 [file s1]

Table S1: Collection details of the anaflexistylous and cataflexistylous leaf tissue samples of *Alpinia nigra* from Pakke Tiger Reserve, Arunachal Pradesh, India collected on 09/07/2018.

| Tissue no. | Collection no. | Latitude      | Longitude     | Elevation | Morph type |
|------------|----------------|---------------|---------------|-----------|------------|
| 1          | SR015_18       | N 26°56'59.9" | E 92°59'18.9" | 136m      | Ana        |
| 2          | SR015_18       | N 26°57'00.2" | E 92°59'18.7" | 156m      | Ana        |
| 3          | SR015_18       | N 26°57'00.1" | E 92°59'19.4" | 133m      | Ana        |
| 4          | SR015_18       | N 26°57'01.0" | E 92°59'19.4" | 134m      | Ana        |
| 5          | SR015_18       | N 26°57'01.9" | E 92°59'19.5" | 134m      | Ana        |
| 6          | SR015_18       | N 26°57'02.1" | E 92°59'19.6" | 134m      | Ana        |
| 7          | SR015_18       | N 26°57'02.0" | E 92°59'19.7" | 134m      | Ana        |
| 8          | SR015_18       | N 26°57'02.4" | E 92°59'20.1" | 134m      | Ana        |
| 9          | SR015_18       | N 26°57'02.6" | E 92°59'20.0" | 134m      | Ana        |
| 10         | SR015_18       | N 26°57'03.0" | E 92°59'20.6" | 134m      | Ana        |
| 11         | SR015_18       | N 26°57'02.8" | E 92°59'20.9" | 133m      | Ana        |
| 12         | SR015_18       | N 26°57'03.0" | E 92°59'21.1" | 133m      | Ana        |
| 13         | SR015_18       | N 26°57'03.3" | E 92°59'21.2" | 133m      | Ana        |
| 14         | SR015_18       | N 26°57'03.5" | E 92°59'21.2" | 133m      | Ana        |
| 15         | SR015_18       | N 26°57'03.7" | E 92°59'21.2" | 133m      | Ana        |
| 16         | SR015_18       | N 26°57'03.8" | E 92°59'21.4" | 133m      | Ana        |
| 17         | SR015_18       | N 26°57'03.9" | E 92°59'21.6" | 133m      | Ana        |
| 18         | SR015_18       | N 26°57'04.0" | E 92°59'21.4" | 133m      | Ana        |

|    |          |               |               |      |     |
|----|----------|---------------|---------------|------|-----|
| 19 | SR015_18 | N 26°57'04.1" | E 92°59'20.9" | 132m | Ana |
| 20 | SR015_18 | N 26°57'04.5" | E 92°59'21.6" | 133m | Ana |
| 21 | SR015_18 | N 26°57'04.6" | E 92°59'21.4" | 133m | Ana |
| 22 | SR015_18 | N 26°57'05.1" | E 92°59'21.5" | 133m | Ana |
| 23 | SR015_18 | N 26°57'05.2" | E 92°59'21.4" | 132m | Ana |
| 24 | SR015_18 | N 26°57'04.9" | E 92°59'22.3" | 132m | Ana |
| 25 | SR015_18 | N 26°57'04.9" | E 92°59'22.6" | 132m | Ana |
| 26 | SR015_18 | N 26°57'05.5" | E 92°59'22.9" | 133m | Ana |
| 27 | SR015_18 | N 26°57'05.5" | E 92°59'23.4" | 133m | Ana |
| 28 | SR015_18 | N 26°57'05.7" | E 92°59'23.6" | 133m | Ana |
| 29 | SR015_18 | N 26°57'05.8" | E 92°59'24"   | 133m | Ana |
| 30 | SR015_18 | N 26°57'05.8" | E 92°59'25.5" | 133m | Ana |
| 31 | SR015_18 | N 26°57'07.3" | E 92°59'28.7" | 130m | Ana |
| 32 | SR015_18 | N 26°57'07.3" | E 92°59'29"   | 128m | Ana |
| 33 | SR015_18 | N 26°57'08.2" | E 92°59'29.3" | 128m | Ana |
| 34 | SR015_18 | N 26°57'08.3" | E 92°59'30.2" | 128m | Ana |
| 35 | SR015_18 | N 26°57'08.2" | E 92°59'30.5" | 129m | Ana |
| 36 | SR015_18 | N 26°57'16.8" | E 92°59'32.7" | 129m | Ana |
| 37 | SR015_18 | N 26°57'12.1" | E 92°59'33.3" | 121m | Ana |
| 38 | SR015_18 | N 26°57'11.7" | E 92°59'33.4" | 122m | Ana |

|    |          |               |               |      |      |
|----|----------|---------------|---------------|------|------|
| 39 | SR015_18 | N 26°57'10.1" | E 92°59'33.1" | 123m | Ana  |
| 40 | SR015_18 | N 26°56'24.1" | E 92°59'00.8" | 146m | Ana  |
| 41 | SR015_18 | N 26°56'28.9" | E 92°59'03.3" | 121m | Ana  |
| 42 | SR015_18 | N 26°56'29.5" | E 92°59'04.9" | 120m | Ana  |
| 43 | SR015_18 | N 26°56'31.1" | E 92°59'04.7" | 121m | Ana  |
| 44 | SR015_18 | N 26°56'31.6" | E 92°59'05.8" | 122m | Ana  |
| 45 | SR015_18 | N 26°56'32"   | E 92°59'06.6" | 122m | Ana  |
| 46 | SR015_18 | N 26°56'38.5" | E 92°59'08.9" | 122m | Ana  |
| 47 | SR015_18 | N 26°56'38.8" | E 92°59'10.1" | 122m | Ana  |
| 48 | SR015_18 | N 26°56'39"   | E 92°59'10.8" | 122m | Ana  |
| 49 | SR015_18 | N 26°56'39.6" | E 92°59'11.6" | 122m | Ana  |
| 50 | SR015_18 | N 26°56'51.9" | E 92°59'13.2" | 126m | Ana  |
| 51 | SR015_18 | N 26°57'00.0" | E 92°59'19"   | 128m | Ana  |
| 1  | SR015_18 | N 26°57'00.1" | E 92°59'18.7" | 207m | Cata |
| 2  | SR015_18 | N 26°57'00.2" | E 92°59'19"   | 138m | Cata |
| 3  | SR015_18 | N 26°57'00.2" | E 92°59'19"   | 138m | Cata |
| 4  | SR015_18 | N 26°57'00.3" | E 92°59'19.3" | 134m | Cata |
| 5  | SR015_18 | N 26°57'01.1" | E 92°59'19.2" | 135m | Cata |
| 6  | SR015_18 | N 26°57'01.5" | E 92°59'19.7" | 135m | Cata |
| 7  | SR015_18 | N 26°57'02.0" | E 92°59'19.7" | 135m | Cata |

|    |          |               |               |      |      |
|----|----------|---------------|---------------|------|------|
| 8  | SR015_18 | N 26°57'01.9" | E 92°59'19.8" | 134m | Cata |
| 9  | SR015_18 | N 26°57'02.4" | E 92°59'20.2" | 134m | Cata |
| 10 | SR015_18 | N 26°57'02.5" | E 92°59'20.0" | 134m | Cata |
| 11 | SR015_18 | N 26°57'03.0" | E 92°59'20.4" | 134m | Cata |
| 12 | SR015_18 | N 26°57'03.0" | E 92°59'20.7" | 133m | Cata |
| 13 | SR015_18 | N 26°57'03.1" | E 92°59'21.1" | 133m | Cata |
| 14 | SR015_18 | N 26°57'03.5" | E 92°59'21.2" | 133m | Cata |
| 15 | SR015_18 | N 26°57'03.5" | E 92°59'21.4" | 133m | Cata |
| 16 | SR015_18 | N 26°57'03.7" | E 92°59'21.2" | 133m | Cata |
| 17 | SR015_18 | N 26°57'03.7" | E 92°59'21.2" | 133m | Cata |
| 18 | SR015_18 | N 26°57'03.9" | E 92°59'21.6" | 133m | Cata |
| 19 | SR015_18 | N 26°57'04.1" | E 92°59'21.3" | 133m | Cata |
| 20 | SR015_18 | N 26°57'04.5" | E 92°59'21.5" | 133m | Cata |
| 21 | SR015_18 | N 26°57'04.9" | E 92°59'21.6" | 132m | Cata |
| 22 | SR015_18 | N 26°57'05.1" | E 92°59'21.4" | 132m | Cata |
| 23 | SR015_18 | N 26°57'05.2" | E 92°59'21.4" | 133m | Cata |
| 24 | SR015_18 | N 26°57'05.4" | E 92°59'21.5" | 133m | Cata |
| 25 | SR015_18 | N 26°57'05.5" | E 92°59'21.5" | 133m | Cata |
| 26 | SR015_18 | N 26°57'05.6" | E 92°59'21.8" | 132m | Cata |
| 27 | SR015_18 | N 26°57'05.2" | E 92°59'22.2" | 132m | Cata |

|    |          |               |               |      |      |
|----|----------|---------------|---------------|------|------|
| 28 | SR015_18 | N 26°57'05.0" | E 92°59'22.9" | 132m | Cata |
| 29 | SR015_18 | N 26°57'05.2" | E 92°59'23"   | 133m | Cata |
| 30 | SR015_18 | N 26°57'05.6" | E 92°59'23"   | 133m | Cata |
| 31 | SR015_18 | N 26°57'05.5" | E 92°59'23.4" | 133m | Cata |
| 32 | SR015_18 | N 26°57'05.8" | E 92°59'23.4" | 133m | Cata |
| 33 | SR015_18 | N 26°57'05.5" | E 92°59'24.3" | 133m | Cata |
| 34 | SR015_18 | N 26°57'05.6" | E 92°59'24.4" | 132m | Cata |
| 35 | SR015_18 | N 26°57'05.4" | E 92°59'24.7" | 132m | Cata |
| 36 | SR015_18 | N 26°57'05.6" | E 92°59'25.4" | 132m | Cata |
| 37 | SR015_18 | N 26°57'05.8" | E 92°59'25.6" | 133m | Cata |
| 38 | SR015_18 | N 26°57'05.9" | E 92°59'26.2" | 133m | Cata |
| 39 | SR015_18 | N 26°57'06.3" | E 92°59'26.7" | 133m | Cata |
| 40 | SR015_18 | N 26°57'07.1" | E 92°59'27.3" | 133m | Cata |
| 41 | SR015_18 | N 26°57'08.2" | E 92°59'29.4" | 133m | Cata |
| 42 | SR015_18 | N 26°57'08.4" | E 92°59'30.0" | 128m | Cata |
| 43 | SR015_18 | N 26°57'14.9" | E 92°59'31.8" | 122m | Cata |
| 44 | SR015_18 | N 26°57'16.6" | E 92°59'32.2" | 122m | Cata |
| 45 | SR015_18 | N 26°57'16.2" | E 92°59'33.4" | 122m | Cata |
| 46 | SR015_18 | N 26°57'09.5" | E 92°59'32.5" | 123m | Cata |
| 47 | SR015_18 | N 26°56'25.6" | E 92°59'01.4" | 117m | Cata |

|    |          |               |               |      |      |
|----|----------|---------------|---------------|------|------|
| 48 | SR015_18 | N 26°56'27.1" | E 92°59'02.6" | 119m | Cata |
| 49 | SR015_18 | N 26°56'28.1" | E 92°59'02.9" | 119m | Cata |
| 50 | SR015_18 | N 26°56'29.2" | E 92°59'03.6" | 120m | Cata |
| 51 | SR015_18 | N 26°56'30.3" | E 92°59'05.2" | 120m | Cata |
| 52 | SR015_18 | N 26°56'30.9" | E 92°59'04.7" | 122m | Cata |
| 53 | SR015_18 | N 26°56'31.8" | E 92°59'06.2" | 122m | Cata |
| 54 | SR015_18 | N 26°56'32.2" | E 92°59'06.6" | 122m | Cata |
| 55 | SR015_18 | N 26°56'32.2" | E 92°59'07.0" | 122m | Cata |
| 56 | SR015_18 | N 26°56'32.8" | E 92°59'07.7" | 122m | Cata |
| 57 | SR015_18 | N 26°56'33.5" | E 92°59'09.3" | 122m | Cata |
| 58 | SR015_18 | N 26°56'37.9" | E 92°59'09.2" | 123m | Cata |
| 59 | SR015_18 | N 26°56'38.3" | E 92°59'08.7" | 123m | Cata |
| 60 | SR015_18 | N 26°56'39.6" | E 92°59'11.1" | 123m | Cata |
| 61 | SR015_18 | N 26°56'40.2" | E 92°59'12.6" | 122m | Cata |
| 62 | SR015_18 | N 26°56'54.5" | E 92°59'10.2" | 126m | Cata |
| 63 | SR015_18 | N 26°56'56.2" | E 92°59'11.0" | 126m | Cata |
| 64 | SR015_18 | N 26°56'20.2" | E 92°58'57.3" | 145m | Cata |

---

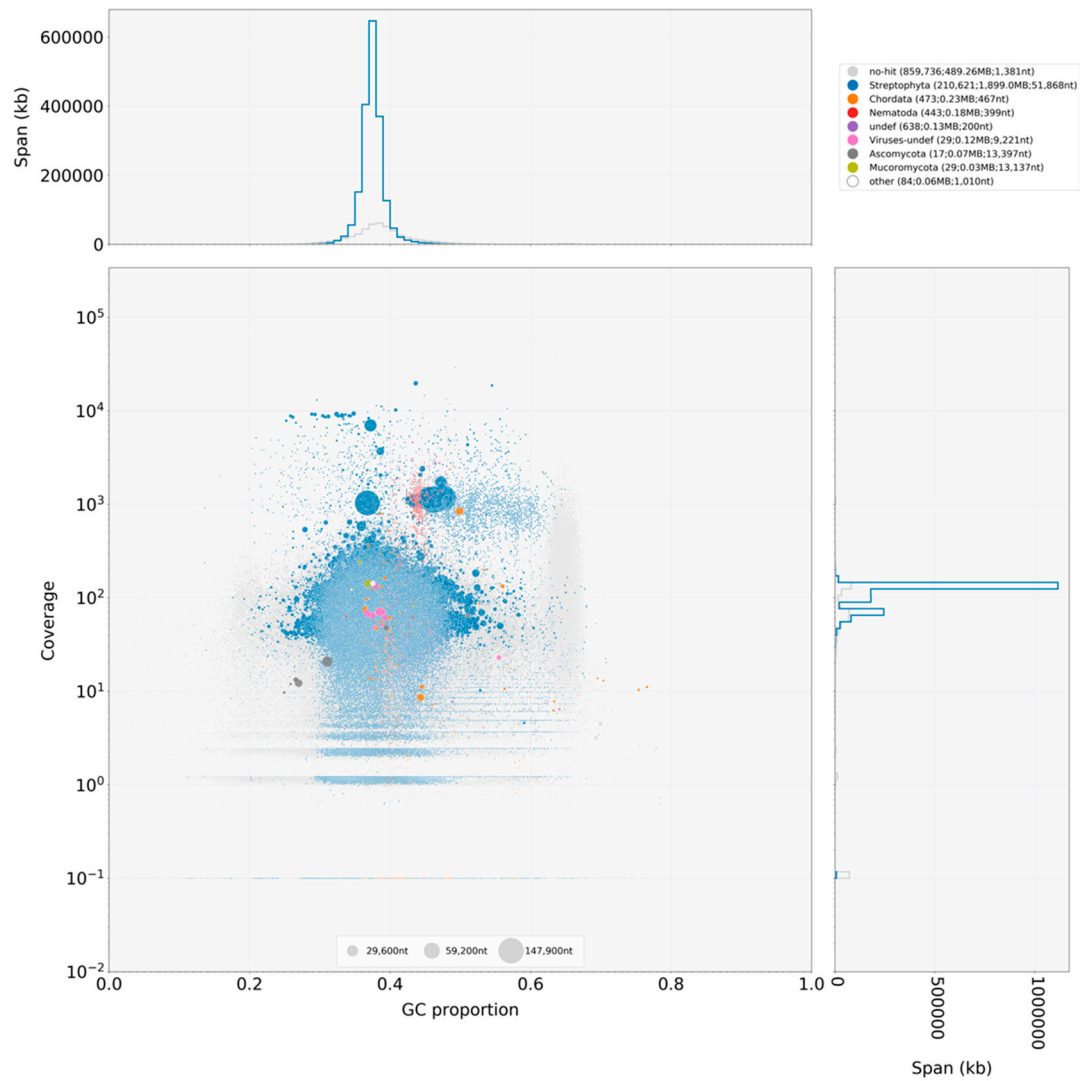

Figure S1: Blobplot for the *Alpinia nigra* reads using Blobtools v1.1.1. This plot was produced using the hits obtained from blastn and Diamond hits of NCBI nucleotide or UniProt proteome databases. These hits were used to assign taxonomy (using bestsumorder). 97.69% of the reads mapped back to the assembly out of which 84.79% belonged to Streptophyta and 12.73% were no-hits. The values in the brackets of the legend represent count, sum length and n50.

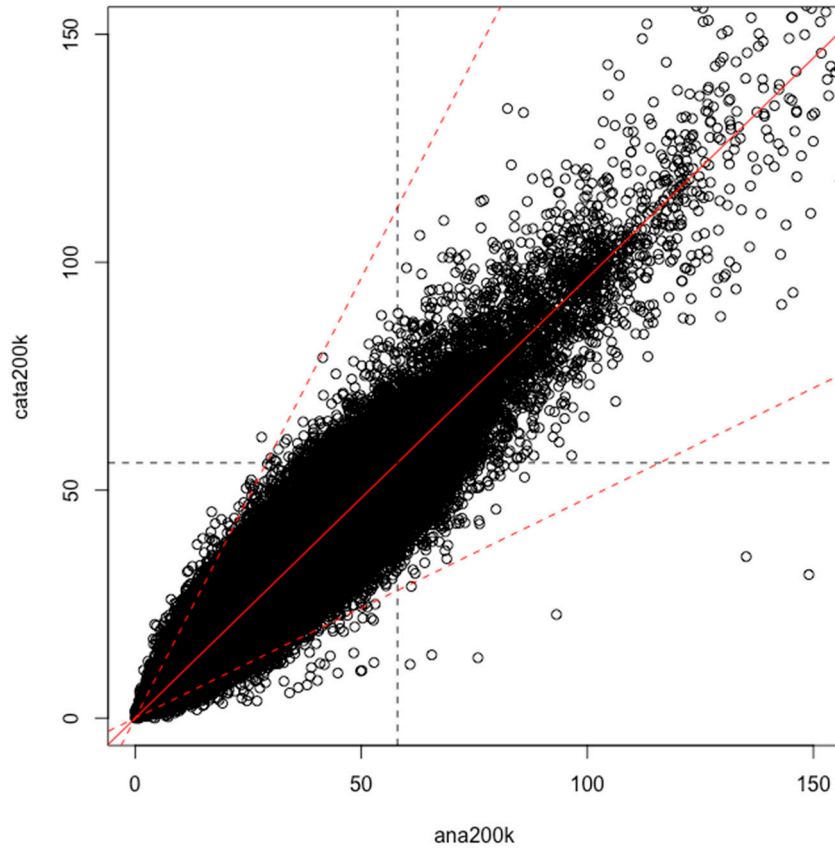

Figure S2: A comparison of the paired mapping depth per contig of the anaflexistylous and cataflexistylous pools of the 200,000 longest contigs ordered by length. The solid red line indicates line of equal depth and the dashed red lines indicate 1/2x and 2x coverage difference. The dashed black lines indicate expected mapping depths. The reference assembly is of a cataflexistylous individual. There are a few sequences with  $\frac{1}{2}$  coverage in ana but these might be noise due to the presence of short scaffolds.
